# Supplementary material for: A pilot study on extractable organofluorine and per- and polyfluoroalkyl substances (PFAS) in water from drinking water treatment plants around Taihu Lake, China: what is missed by target PFAS analysis?
Source: Royal Society of Chemistry journal article supplement (doi:10.1039/d2em00073c), 2022-01-01
Supplement: d2em00073c1.pdf [file d2em00073c1.pdf]

## Supporting information

### **A pilot study on extractable organofluorine and per- and polyfluoroalkyl substances (PFAS) in water from drinking water treatment plants around Taihu Lake, China: what is missed by target PFAS analysis?**

Enmiao Jiao<sup>a</sup>, Zhiliang Zhu<sup>a</sup>, Daqiang Yin<sup>a</sup>, Yanling Qiu<sup>\*a</sup>, Anna Kärman<sup>b</sup>, Leo W.Y. Yeung<sup>\*b</sup>

\*Corresponding authors:

[ylqiu@tongji.edu.cn](mailto:ylqiu@tongji.edu.cn);

[Leo.Yeung@oru.se](mailto:Leo.Yeung@oru.se),

<sup>a</sup> Key Laboratory of Yangtze River Water Environment, College of Environmental Science and Engineering, Tongji University, Shanghai 200092, China.

<sup>b</sup> Man-Technology-Environment Research Centre (MTM), School of Science and Technology, Örebro University, SE-70182 Örebro, Sweden.

Table S1 Chemicals and MRM transition

Table S2 Parameters for QTOF analysis

Table S3 Spike recovery test results

Table S4 Internal standard recovery in raw and treated water samples

Table S5 MDL and MQL of the target PFAS (ng/L)

Table S6 Changes of EOF and different classes of PFAS after treatment processes

Table S7 Concentrations of PFAS in raw and treated water from 8 DWTPs in China (ng/L)

Table S8 PFASs identified in samples by suspect screening on a confidence level of 2 or 3 (target PFAS not included)

Figure S1 Suspect PFAS composition (based on intensity)

Table S1 Chemicals and MRM transition

| Class | Abbreviation | Name                           | Quantification ion (m/z) | Qualification ion (m/z) | Internal standard                    |
|-------|--------------|--------------------------------|--------------------------|-------------------------|--------------------------------------|
| PFCAs | TFA          | Trifluoroacetic acid           | 112.9/68.96              |                         | <sup>13</sup> C <sub>4</sub> -PFBA   |
|       | PFPrA        | Perfluoropropanoic acid        | 162.97/118.9             |                         | <sup>13</sup> C <sub>4</sub> -PFBA   |
|       | PFBA         | Perfluorobutanoic acid         | 212.97/169               |                         | <sup>13</sup> C <sub>4</sub> -PFBA   |
|       | PFPeA        | Perfluoropentanoic acid        | 262.97/219               |                         | <sup>13</sup> C <sub>3</sub> -PFPeA  |
|       | PFHxA        | Perfluorohexanoic acid         | 312.97/269               | 312.97/118.95           | <sup>13</sup> C <sub>2</sub> -PFHxA  |
|       | PFHpA        | Perfluoroheptanoic acid        | 362.97/319               | 362.97/168.97           | <sup>13</sup> C <sub>4</sub> -PFHpA  |
|       | PFOA         | Perfluorooctanoic acid         | 412.97/369               | 412.97/168.97           | <sup>13</sup> C <sub>4</sub> -PFOA   |
|       | PFNA         | Perfluorononanoic acid         | 462.99/419               | 462.99/219              | <sup>13</sup> C <sub>5</sub> -PFNA   |
|       | PFDA         | Perfluorodecanoic acid         | 512.97/469               | 512.97/219              | <sup>13</sup> C <sub>2</sub> -PFDA   |
|       | PFUnDA       | Perfluoroundecanoic acid       | 562.97/519               | 562.97/268.99           | <sup>13</sup> C <sub>2</sub> -PFUnDA |
|       | PFDoDA       | Perfluorododecanoic acid       | 612.97/569               | 612.97/168.96           | <sup>13</sup> C <sub>2</sub> -PFDoDA |
|       | PFTTrDA      | Perfluorotridecanoic acid      | 662.9/619                | 662.9/168.96            | <sup>13</sup> C <sub>2</sub> -PFDoDA |
|       | PFTDA        | Perfluorotetradecanoic acid    | 712.9/669                | 712.9/168.97            | <sup>13</sup> C <sub>2</sub> -PFTDA  |
|       | PFHxDA       | Perfluorohexadecanoic acid     | 812.9/769                | 812.9/168.96            | <sup>13</sup> C <sub>2</sub> -PFHxDA |
|       | PFocDA       | Perfluorooctadecanoic acid     | 912.9/869                | 912.9/168.96            | <sup>13</sup> C <sub>2</sub> -PFHxDA |
| PFSA  | TFMS         | Trifluoromethane sulfonic acid | 149.12/79.91             | 149.12/98.95            | <sup>13</sup> C <sub>3</sub> -PFBS   |
|       | PFEtS        | Perfluoroethane sulfonic acid  | 198.8/79.8               | 198.8/98.9              | <sup>13</sup> C <sub>3</sub> -PFBS   |
|       | PFPrS        | Perfluoropropane sulfonic acid | 248.9/79.9               | 248.9/98.9              | <sup>13</sup> C <sub>3</sub> -PFBS   |
|       | PFBS         | Perfluorobutane sulfonic acid  | 298.9/98.9               | 298.9/79.96             | <sup>13</sup> C <sub>3</sub> -PFBS   |
|       | PFPeS        | Perfluoropentane sulfonic acid | 348.9/98.96              | 348.9/79.96             | <sup>18</sup> O <sub>2</sub> -PFHxS  |
|       | PFHxS        | Perfluorohexane sulfonic acid  | 398.9/98.9               | 398.9/79.96             | <sup>18</sup> O <sub>2</sub> -PFHxS  |
|       | PFHpS        | Perfluoroheptanesulfonic acid  | 448.97/98.9              | 448.97/79.96            | <sup>13</sup> C <sub>4</sub> -PFOS   |

|               |              |                                                    |                |                               |                                         |
|---------------|--------------|----------------------------------------------------|----------------|-------------------------------|-----------------------------------------|
|               | PFOS         | Perfluorooctane sulfonic acid                      | 498.97/98.9    | 498.97/79.96<br>498.97/169.03 | <sup>13</sup> C <sub>4</sub> -PFOS      |
|               | PFNS         | Perfluorononane sulfonic acid                      | 548.9/98.96    | 548.9/79.96                   | <sup>13</sup> C <sub>4</sub> -PFOS      |
|               | PFDS         | Perfluorodecane sulfonic acid                      | 598.97/98.9    | 598.97/79.96                  | <sup>13</sup> C <sub>4</sub> -PFOS      |
|               | PFDoDS       | Perfluorododecane sulfonic acid                    | 698.9/98.9     | 698.9/79.96                   | <sup>13</sup> C <sub>4</sub> -PFOS      |
| FTSAs         | 4:2 FTSA     | 4:2 fluorotelomer sulfonic acid                    | 327/307        | 327/81                        | <sup>13</sup> C <sub>2</sub> -6:2 FTSA  |
|               | 6:2 FTSA     | 6:2 fluorotelomer sulfonic acid                    | 427/407        | 427/81                        | <sup>13</sup> C <sub>2</sub> -6:2 FTSA  |
|               | 8:2 FTSA     | 8:2 fluorotelomer sulfonic acid                    | 527/507        | 527/81                        | <sup>13</sup> C <sub>2</sub> -8:2 FTSA  |
| FTCAs         | 5:3 FTCA     | 5:3 fluorotelomer carboxylic acid                  | 340.9/236.97   | 340.9/216.93                  | <sup>13</sup> C <sub>2</sub> -6:2 FTUCA |
|               | 7:3 FTCA     | 7:3 fluorotelomer carboxylic acid                  | 440.9/316.93   | 440.9/336.89                  | <sup>13</sup> C <sub>2</sub> -8:2 FTUCA |
|               | ADONA        | 3H-perfluoro-3-[(3-methoxy-propoxy)propanoic acid] | 376.97/250.8   | 376.97/84.69                  | <sup>18</sup> O <sub>2</sub> -PFHxS     |
|               | HFPO-DA      | hexafluoropropylene oxide dimer acid               | 284.92/168.72  | 328.95/284.86                 | <sup>13</sup> C <sub>3</sub> -HFPO-DA   |
| Novel<br>PFAS | 8:2 Cl-PFESA | 8:2 chlorinated polyfluorinated<br>ether sulfonate | 630.904/450.98 | 630.904/83.027                | <sup>13</sup> C <sub>4</sub> -PFOS      |
|               | 6:2 Cl-PFESA | 6:2 chlorinated polyfluorinated<br>ether sulfonate | 530.904/350.98 | 530.904/83.027                | <sup>13</sup> C <sub>4</sub> -PFOS      |
|               | PFECHS       | Perfluoro-4-ethylcyclohexane sulfonate             | 460.84/380.9   | 460.84/98.88                  | <sup>13</sup> C <sub>4</sub> -PFOA      |

---

Table S2 Parameters for QTOF analysis

The following parameters were set for initial filtering: (1) S/N > 3; (2) LC peak width less than 30 s; and (3) intensity >5 times the intensity in the procedural blank. Suspect screening was conducted with the PFAS suspect list followed previous studies<sup>1, 2</sup>, and the screening processes were performed by R scripts (R v3.6.2, R Foundation for Statistical Computing, Vienna, Austria).

| UPLC conditions                                                                                                    |               |               | ESI- parameters                       |
|--------------------------------------------------------------------------------------------------------------------|---------------|---------------|---------------------------------------|
| Analytical column: Acquity UPLC-BEH C18 (100 mm x 2.1 mm x 1.7 µm)                                                 |               |               | Ionization: ESI-                      |
| Mobile phase: (A) 2 mM NH <sub>4</sub> Ac + H <sub>2</sub> O / MeOH (70/30);<br>(B) 2 mM NH <sub>4</sub> Ac + MeOH |               |               | Acquisition time: 0.5 to 15 min       |
| Column temperature: 50 °C                                                                                          |               |               | Acquisition function: MS <sup>E</sup> |
| Injection volume: 10 µL                                                                                            |               |               | Mass range: m/z 50-1200               |
| Rinse solvent: H <sub>2</sub> O:MeOH:ACN:IPA 1:1:1:1                                                               |               |               | Analyzer mode: Sensitivity            |
| Sample temperature: 10 °C                                                                                          |               |               | Capillary voltage: 0.5 kV             |
| Flow rate: 0.3 mL/min                                                                                              |               |               | Sample cone: 10 V                     |
| Source temperature: 100 °C                                                                                         |               |               | Cone gas flow: 100 L/h                |
| Mobile phase gradient:                                                                                             |               |               | Desolvation gas flow: 1000 L/h        |
| Time                                                                                                               | Composition A | Composition B | Desolvation temperature: 350°C        |
| 0 min                                                                                                              | 99%           | 1%            | Scan rate: 5 Hz                       |
| 0.5 min                                                                                                            | 99%           | 1%            | Low energy: 4 eV                      |
| 13 min                                                                                                             | 0%            | 100%          | High energy ramp: 20-70               |
| 14 min                                                                                                             | 0%            | 100%          | Lockspray: Leucine Enkephalin         |
| 14.2 min                                                                                                           | 99%           | 1%            | m/z 554.2620                          |
| 16 min                                                                                                             | 99%           | 1%            | Scan time 0.25 s                      |
|                                                                                                                    |               |               | Interval: 10s                         |

Table S3 Spike recovery test results using Milli-Q water (n=3, 2 ng)

| Compounds | Mean recovery (%) | RSD | Compounds | Mean recovery (%) | RSD |
|-----------|-------------------|-----|-----------|-------------------|-----|
| PFBA      | 101               | 9%  | PFTTrDA   | 74                | 5%  |
| PFPeA     | 96                | 5%  | PFBS      | 86                | 4%  |
| PFHxA     | 96                | 5%  | PFHxS     | 96                | 4%  |
| PFHpA     | 96                | 3%  | PFOS      | 89                | 8%  |
| PFOA      | 96                | 5%  | 6:2 FTSA  | 102               | 6%  |
| PFNA      | 90                | 14% | HFPO-DA   | 76                | 17% |
| PFDA      | 96                | 6%  | ADONA     | 83                | 18% |
| PFUnDA    | 96                | 6%  | F-53B     | 80                | 3%  |
| PFDODA    | 95                | 6%  |           |                   |     |

Table S4 Internal standard recovery in raw and treated water samples (n=16, 2 ng)

| Compounds                            | Mean recovery (%) | RSD | Compounds                              | Mean recovery (%) | RSD |
|--------------------------------------|-------------------|-----|----------------------------------------|-------------------|-----|
| <sup>13</sup> C <sub>4</sub> -PFBA   | 56                | 24% | <sup>13</sup> C <sub>2</sub> -PFTDA    | 48                | 34% |
| <sup>13</sup> C <sub>3</sub> -PFPeA  | 82                | 6%  | <sup>13</sup> C <sub>2</sub> -PFHxDA   | 32                | 50% |
| <sup>13</sup> C <sub>2</sub> -PFHxA  | 82                | 6%  | <sup>13</sup> C <sub>3</sub> -PFBS     | 90                | 12% |
| <sup>13</sup> C <sub>4</sub> -PFHpA  | 90                | 10% | <sup>18</sup> O <sub>2</sub> -PFHxS    | 92                | 6%  |
| <sup>13</sup> C <sub>4</sub> -PFOA   | 84                | 5%  | <sup>13</sup> C <sub>4</sub> -PFOS     | 89                | 7%  |
| <sup>13</sup> C <sub>5</sub> -PFNA   | 74                | 28% | <sup>13</sup> C <sub>2</sub> -6:2 FTSA | 181               | 35% |
| <sup>13</sup> C <sub>2</sub> -PFDA   | 81                | 9%  | <sup>13</sup> C <sub>3</sub> -HFPO-DA  | 59                | 33% |
| <sup>13</sup> C <sub>2</sub> -PFUnDA | 75                | 10% | <sup>13</sup> C <sub>2</sub> -8:2 FTSA | 63                | 16% |
| <sup>13</sup> C <sub>2</sub> -PFDoDA | 67                | 16% |                                        |                   |     |

Table S5 MDL and MQL of the target PFAS (ng/L)

| Individual compounds | Batch1 |        | Batch2 |        | Batch3  |        | Batch4 |        |
|----------------------|--------|--------|--------|--------|---------|--------|--------|--------|
|                      | MDL    | MQL    | MDL    | MQL    | MDL     | MQL    | MDL    | MQL    |
| <b>PFBA</b>          | 0.0660 | 0.0720 | 0.0770 | 0.142  | 0.102   | 0.148  | 0.167  | 0.389  |
| <b>PFPeA</b>         | /      | 0.0200 | /      | 0.0200 | /       | 0.0200 | /      | 0.0200 |
| <b>PFHxA</b>         | 0.0190 | 0.0250 | 0.0300 | 0.063  | 0.0350  | 0.0590 | 0.0350 | 0.0460 |
| <b>PFHpA</b>         | /      | 0.0200 | /      | 0.0200 | 0.0160  | 0.0250 | 0.111  | 0.293  |
| <b>PFOA</b>          | 0.0470 | 0.0810 | 0.0540 | 0.103  | 0.0380  | 0.0380 | 0.0450 | 0.0560 |
| <b>PFNA</b>          | /      | 0.0200 | /      | 0.0200 | 0.0360  | 0.0810 | 0.0260 | 0.0350 |
| <b>PFDA</b>          | 0.0270 | 0.0560 | 0.0280 | 0.0400 | 0.0230  | 0.0400 | 0.0210 | 0.0220 |
| <b>PFUnDA</b>        | 0.0120 | 0.0130 | 0.0160 | 0.0220 | 0.0340  | 0.0750 | 0.0170 | 0.0170 |
| <b>PFDoDA</b>        | /      | 0.0200 | /      | 0.0200 | 0.00900 | 0.0160 | /      | 0.0200 |
| <b>PFTTrDA</b>       | /      | 0.0200 | /      | 0.0200 | 0.00900 | 0.0180 | /      | 0.0200 |
| <b>PFBS</b>          | 0.0200 | 0.0230 | 0.0310 | 0.0530 | 0.0420  | 0.0860 | 0.0320 | 0.0430 |
| <b>PFPeS</b>         | /      | 0.0200 | /      | 0.0200 | /       | 0.0200 | /      | 0.0200 |
| <b>PFHxS</b>         | 0.0260 | 0.0570 | 0.0180 | 0.0330 | 0.0200  | 0.0280 | 0.0210 | 0.0270 |
| <b>PFOS</b>          | 0.0410 | 0.100  | 0.0690 | 0.181  | 0.0280  | 0.0540 | 0.0340 | 0.0560 |
| <b>6:2 FTSA</b>      | /      | 0.0200 | /      | 0.0200 | 0.0670  | 0.119  | 0.0460 | 0.0480 |
| <b>HFPO-DA</b>       | /      | 0.0500 | /      | 0.0500 | /       | 0.0500 | /      | 0.0500 |
| <b>ADONA</b>         | /      | 0.0500 | /      | 0.0500 | /       | 0.0500 | /      | 0.0500 |
| <b>F-53B</b>         | /      | 0.0500 | /      | 0.0500 | /       | 0.0500 | /      | 0.0500 |
| <b>TFA</b>           | /      | 0.0200 | 0.0270 | 0.0280 | 0.224   | 0.448  | 0.449  | 1.05   |
| <b>PFPrA</b>         | /      | 0.0200 | 7.35   | 12.6   | 1.48    | 2.85   | 1.76   | 4.08   |
| <b>TFMS</b>          | /      | 0.0200 | 0.0170 | 0.0370 | 0.100   | 0.266  | 0.0810 | 0.208  |
| <b>PFEtS</b>         | /      | 0.0200 | /      | 0.0200 | 0.00700 | 0.0190 | /      | 0.0200 |
| <b>PFPrS</b>         | /      | 0.0200 | /      | 0.0200 | /       | 0.020  | /      | 0.0200 |

Table S6 Changes of EOF and different classes of PFAS after treatment processes

|                   | D3                | D4                | D5                | D8                |
|-------------------|-------------------|-------------------|-------------------|-------------------|
|                   | (Treated-Raw)/Raw | (Treated-Raw)/Raw | (Treated-Raw)/Raw | (Treated-Raw)/Raw |
| EOF               | 2.1%              | -9.9%             | -33.3%            | 59.4%             |
| Short-chain PFCAs | -7.1%             | 2.0%              | -15.2%            | 10.1%             |
| Short-chain PFSAs | -2.8%             | 9.2%              | 25.8%             | 91.9%             |
| Long-chain PFCAs  | -1.1%             | 12.8%             | -10.3%            | -47.6%            |
| Long-chain PFSAs  | -2.3%             | 7.4%              | 17.6%             | -31.6%            |
| Novel PFAS        | 25.8%             | 8.4%              | -0.7%             | 8.8%              |
| Ultra-short PFAS  | -53.7%            | 35.2%             | 36.8%             | 99.4%             |

Table S7 Concentrations of PFAS in raw and treated water from 8 DWTPs in China (ng/L)

|            |      | Concentrations of PFAS in raw and treated water from 8 DWTPs in China (ng/L) |               |           |               |           |               |           |               |           |               |           |               |           |               |           |               |
|------------|------|------------------------------------------------------------------------------|---------------|-----------|---------------|-----------|---------------|-----------|---------------|-----------|---------------|-----------|---------------|-----------|---------------|-----------|---------------|
| Individual | PFAS | D1                                                                           |               | D2        |               | D3        |               | D4        |               | D5        |               | D6        |               | D7        |               | D8        |               |
|            |      | Raw water                                                                    | Treated water | Raw water | Treated water | Raw water | Treated water | Raw water | Treated water | Raw water | Treated water | Raw water | Treated water | Raw water | Treated water | Raw water | Treated water |
|            | PFBA | 8.34                                                                         | 8.35          | 10.4      | 10.4          | 10.8      | 9.83          | 12.7      | 11.0          | 10.1      | 8.39          | 1.90      | 1.82          | 0.457     | 0.678         | 4.44      | 4.80          |

|          |        |        |        |        |        |        |        |        |        |        |        |        |        |        |        |        |
|----------|--------|--------|--------|--------|--------|--------|--------|--------|--------|--------|--------|--------|--------|--------|--------|--------|
| PFPeA    | 3.04   | 3.10   | 3.98   | 3.73   | 3.97   | 3.55   | 4.41   | 4.56   | 3.81   | 3.31   | 0.640  | 0.632  | 0.138  | 0.153  | 0.444  | 0.561  |
| PFHxA    | 8.42   | 9.37   | 8.83   | 9.11   | 9.44   | 8.86   | 11.6   | 13.2   | 5.96   | 5.12   | 1.63   | 1.69   | 0.188  | 0.212  | 0.606  | 0.770  |
| PFHpA    | 3.61   | 4.24   | 4.45   | 4.50   | 4.56   | 4.47   | 5.08   | 5.67   | 4.49   | 3.88   | 0.768  | 0.941  | <MQL   | <MQL   | 0.650  | 0.636  |
| PFOA     | 24.6   | 29.4   | 30.1   | 29.5   | 32.9   | 32.6   | 42.5   | 49.0   | 34.5   | 31.5   | 5.41   | 6.47   | 1.37   | 1.36   | 7.85   | 4.12   |
| PFNA     | 3.87   | 4.22   | 4.12   | 3.00   | 3.49   | 3.56   | 3.57   | 3.52   | 3.52   | 3.11   | 0.672  | 0.748  | 0.225  | 0.197  | 0.348  | 0.173  |
| PFDA     | 1.66   | 1.58   | 1.59   | 1.85   | 2.07   | 1.92   | 1.92   | 1.57   | 2.54   | 1.86   | 0.474  | 0.277  | 0.121  | 0.0680 | 0.0970 | 0.0520 |
| PFUnDA   | 0.472  | 0.205  | 0.416  | 0.602  | 0.757  | 0.475  | 0.523  | 0.396  | 1.85   | 0.509  | 0.293  | 0.0460 | 0.105  | 0.0250 | <MQL   | <MQL   |
| PFDoDA   | 0.0650 | <MQL   | 0.0690 | 0.103  | 0.112  | 0.0340 | 0.0840 | 0.0220 | 0.395  | 0.0290 | 0.0620 | <MQL   | 0.0210 | <MQL   | <MQL   | <MQL   |
| PFTTrDA  | 0.0410 | <MQL   | 0.0440 | 0.0780 | 0.0930 | <MQL   | 0.0590 | <MQL   | 0.113  | <MQL   | 0.0560 | <MQL   | <MQL   | <MQL   | <MQL   | <MQL   |
| PFBS     | 3.01   | 3.37   | 4.92   | 4.96   | 5.19   | 5.11   | 6.90   | 7.51   | 1.61   | 1.99   | 0.631  | 0.737  | 0.100  | 0.141  | 1.35   | 2.66   |
| PFPeS    | 0.381  | 0.391  | 0.401  | 0.380  | 0.479  | 0.401  | 0.515  | 0.592  | 0.0240 | 0.0610 | 0.0570 | 0.110  | <MQL   | <MQL   | 0.0660 | 0.0570 |
| PFHxS    | 44.0   | 48.7   | 50.1   | 45.9   | 57.4   | 57.2   | 54.2   | 61.4   | 2.57   | 3.47   | 7.43   | 13.4   | 0.0340 | 0.187  | 1.55   | 1.23   |
| PFOS     | 5.13   | 6.234  | 11.0   | 12.3   | 15.4   | 13.9   | 13.2   | 11.0   | 2.97   | 3.05   | 1.50   | 1.34   | 0.194  | 0.193  | 0.674  | 0.292  |
| 6:2 FTSA | 0.0290 | <MQL   | <MQL   | 0.249  | 0.0360 | 0.0830 | 0.108  | 0.195  | <MQL   | <MQL   | 0.240  | 0.280  | 0.0490 | 0.0530 | 0.0480 | 0.0970 |
| HFPO-DA  | 0.345  | 0.393  | 0.615  | 0.490  | 0.785  | 0.799  | 1.06   | 1.12   | 1.32   | 1.54   | 0.165  | 0.182  | <MQL   | <MQL   | <MQL   | 0.101  |
| F-53B    | 1.58   | 2.46   | 4.14   | 4.76   | 5.03   | 6.48   | 4.27   | 4.57   | 3.19   | 2.95   | 0.453  | 0.541  | 0.0890 | 0.0770 | 0.133  | <MQL   |
| TFA      | 3.61   | 1.61   | 2.31   | 2.44   | 3.03   | <MQL   | <MQL   | <MQL   | <MQL   | 0.567  | 4.14   | 8.96   | 7.94   | <MQL   | <MQL   | <MQL   |
| PFPPrA   | 13.5   | 3.20   | 19.7   | 12.45  | 11.8   | <MQL   | 4.87   | 8.33   | 7.19   | 8.62   | 14.2   | 36.1   | 17.9   | 14.3   | <MQL   | 4.18   |
| TFMS     | 61.3   | 5.07   | 9.01   | 11.1   | 4.31   | 8.72   | 4.59   | 4.544  | 8.49   | 12.3   | 1.08   | 0.580  | <MQL   | <MQL   | 7.48   | 10.7   |
| PFEtS    | 0.0830 | 0.0480 | 0.0580 | 0.0650 | 0.0540 | 0.0490 | 0.0440 | 0.0400 | 0.0390 | 0.0320 | 0.0320 | <MQL   | <MQL   | 0.0220 | 0.0330 | 0.0590 |
| PFPPrS   | 0.162  | 0.0610 | 0.0600 | 0.0580 | 0.0650 | 0.147  | 0.126  | 0.108  | <MQL   | <MQL   | 0.0680 | 0.0690 | 0.0280 | 11.7   | 0.0200 | 0.0770 |

Table S8 PFASs identified in samples by suspect screening with a confidence level of 2 or 3 (target PFAS not included)

| Class                 | Name             | Theoretical<br>m/z | Observed<br>m/z | Mass error<br>(ppm) | Molecular<br>formula | RT<br>(min) | Product ions<br>formula                        | Confidence<br>level | Semi-quantification<br>reference PFAS | Concentrations<br>(ng/L) |
|-----------------------|------------------|--------------------|-----------------|---------------------|----------------------|-------------|------------------------------------------------|---------------------|---------------------------------------|--------------------------|
| H-PFCAs               | H-PFPeA          | 244.9854           | 244.9851        | -1.34               | C5H2F8O2             | 3.38        | C4F7-                                          | 2                   | PFPeA                                 | 0.161-0.975              |
|                       | H-PFOA           | 394.9759           | 394.9752        | -1.65               | C8H2F14O2            | 7.32        | C3F7-<br>C7F13-                                | 3                   | PFOA                                  | 0.0120-0.0180            |
|                       | H-PFNA           | 444.9727           | 444.9712        | -3.26               | C9H2F16O2            | 8.28        | C8F15-                                         | 3                   | PFNA                                  | 0.0190                   |
| H-PFSA <sub>s</sub>   | H-PFBS           | 280.9524           | 280.9523        | -0.43               | C4H2F8O3S            | 3.57        | SO3-<br>FSO3-<br>C3F5-                         | 3                   | PFBS                                  | 0.00500-0.0150           |
|                       | H-PFOS           | 480.9396           | 480.9396        | -0.08               | C8H2F16O3S           | 8.21        | SO3-<br>FSO2-                                  | 3                   | PFOS                                  | 0.00100-0.00200          |
| Cl-PFESA <sub>s</sub> | 5:2 Cl-<br>PFESA | 480.8988           | 480.8985        | -0.58               | C7HF14O4SCl          | 9.5         | C5OF10Cl-                                      | 2                   | PFOS                                  | 0.00100-0.00300          |
| H-PFESA <sub>s</sub>  | 2:2 H-<br>PFESA  | 296.9473           | 296.9473        | -0.10               | C4H2F8O4S            | 4.39        | FSO2-<br>C2OF3-<br>C2HOF4-                     | 2                   | PFBS                                  | 0.00700-0.0320           |
|                       | 4:2 H-<br>PFESA  | 396.9409           | 396.9404        | -1.36               | C6H2F12O4S           | 7.43        | C3F5-<br>C4OF7-<br>C4HOF8-                     | 2                   | PFHxS                                 | 0.00200-0.0130           |
|                       | 6:2 H-<br>PFESA  | 496.9346           | 496.9346        | 0.08                | C8H2F16O4S           | 8.83        | FSO3-<br>FSO2-<br>C5F9-<br>C6OF11-<br>C6HOF12- | 2                   | PFOS                                  | 0.00800-0.439            |



COF3-

---

|     |     |          |          |       |             |       |                                                    |   |      |                |
|-----|-----|----------|----------|-------|-------------|-------|----------------------------------------------------|---|------|----------------|
| OBS | OBS | 602.9564 | 602.9560 | -0.71 | C15H5F17O4S | 10.75 | C6H4O2-<br>C6H4O4S-<br>C11H4O3F7S-<br>C13H4O4F11S- | 2 | PFOS | 0.00100-0.0372 |
|-----|-----|----------|----------|-------|-------------|-------|----------------------------------------------------|---|------|----------------|

---

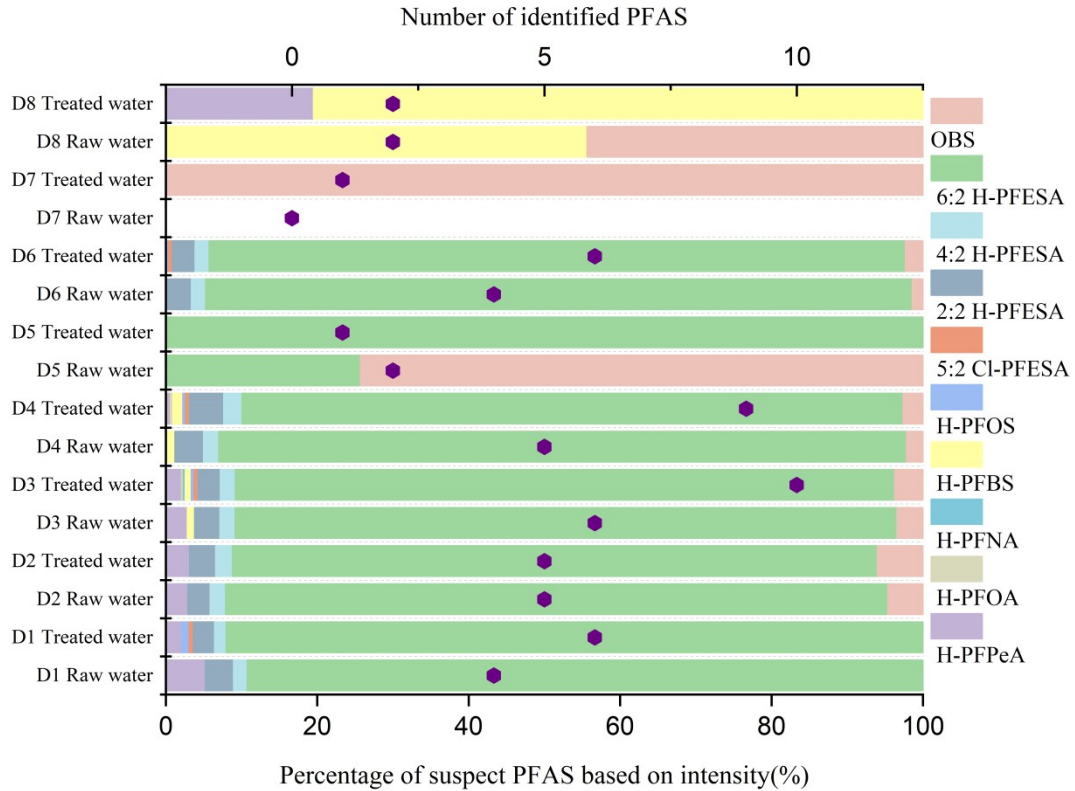

Figure S1 Composition of identified PFAS suspects based on intensity

References:

1. X. Wang, N. Yu, Y. Qian, W. Shi, X. Zhang, J. Geng, H. Yu and S. Wei, Non-target and suspect screening of per- and polyfluoroalkyl substances in Chinese municipal wastewater treatment plants, *Water Res.*, 2020, **183**, 115989.
2. Q. Wang, Y. Ruan, L. Jin, X. Zhang, J. Li, Y. He, S. Wei, J. C. W. Lam and P. K. S. Lam, Target, Nontarget, and Suspect Screening and Temporal Trends of Per- and Polyfluoroalkyl Substances in Marine Mammals from the South China Sea, *Environ. Sci. Technol.*, 2021, **55**, 1045-1056.
